# Supplementary material for: Mechanism for the Intercalation of Aniline Cations into the Interlayers of Graphite
Source: Nanomaterials (Basel). 2022 Jul 20;12(14):2486. doi: 10.3390/nano12142486 (PMC9318139; doi:10.3390/nano12142486)
Supplement: Supplementary file 1 [file nanomaterials-12-02486-s001.zip]

Archive with 4 entries (4 files):
- nanomaterials-1777894 - Supporting Information.pdf
- Video 1. ANI cations gradually absorb on the surface of bilayer graphene (total 10 ns, every 20 ps per frame).mp4
- Video 2. Few ANI cation achieves the intercalation(total 10 ns, every 20 ps per frame).mp4
- Video 3. ANI cations successfully intercalate into the graphite with the assistance of ultrasonication (total 3 ps, every 10 fs per frame).mp4
