# Supplementary material for: Mechanism for the Intercalation of Aniline Cations into the Interlayers of Graphite
Source: Nanomaterials (Basel). 2022 Jul 20;12(14):2486. doi: 10.3390/nano12142486 (PMC9318139; doi:10.3390/nano12142486)
Supplement: Supplementary file 1 [file nanomaterials-12-02486-s001.zip › nanomaterials-1777894 - Supporting Information.pdf]

# Mechanism for the Intercalation of Aniline Cations into the Interlayers of Graphite

Yifan Guo <sup>1,2,3</sup>, Ying Li <sup>4</sup>, Wei Wei <sup>1,3</sup>, Junhua Su <sup>1</sup>, Jinyang Li <sup>1,3,\*</sup>, Yanlei Shang <sup>1</sup>, Yong Wang <sup>1</sup>, Xiaoling Xu <sup>1,3</sup>, David Hui <sup>5</sup> and Zuowan Zhou <sup>1,2,3,\*</sup>

- <sup>1</sup> Key Laboratory of Advanced Technologies of Materials (Ministry of Education), School of Materials Science and Engineering, Southwest Jiaotong University, Chengdu 610031, China; yfguo@swjtu.edu.cn (Y.G.); tzweir@swjtu.edu.cn (W.W.); sjh@my.swjtu.edu.cn (J.S.); ylshang@my.swjtu.edu.cn (Y.S.); yongwang1976@163.com (Y.W.); bihan\_2001@163.com (X.X.)
- <sup>2</sup> Research Institute of Frontier Science, Southwest Jiaotong University, Chengdu 610031, China
- <sup>3</sup> Yibin Research Institute, Southwest Jiaotong University, Yibin 644000, China
- <sup>4</sup> School of Mechanical Engineering, Chengdu University, Chengdu 610106, China; liying@cdu.edu.cn
- <sup>5</sup> Department of Mechanical Engineering, University of New Orleans, New Orleans, LA 70148, USA; dhui@uno.edu
- \* Correspondence: jinyang.li@swjtu.edu.cn (J.L.); zwzhou@swjtu.edu.cn (Z.Z.)

**Table S1.** Experimental design using RSM and corresponding results for the *in situ* intercalation polymerization.

| NO. | Ultrasonication |             | Graphite X3 <sup>a</sup> | Exfoliation degree Y <sup>b</sup> |
|-----|-----------------|-------------|--------------------------|-----------------------------------|
|     | Power X1(W)     | Time X2 (h) |                          |                                   |
| 1   | 300             | 0.5         | SfG                      | 0.08611                           |
| 2   | 500             | 0.5         | SfG                      | 0.03967                           |
| 3   | 700             | 0.5         | SfG                      | 0.04294                           |
| 4   | 300             | 1.5         | SfG                      | 0.05965                           |
| 5   | 700             | 1.5         | SfG                      | 0.04536                           |
| 6   | 300             | 1.0         | MG                       | 0.01974                           |
| 7   | 500             | 1.5         | MG                       | 0.00685                           |
| 8   | 300             | 0.5         | LfG                      | 0.16364                           |
| 9   | 700             | 0.5         | LfG                      | 0.16800                           |
| 10  | 500             | 1.0         | LfG                      | 0.04263                           |
| 11  | 300             | 1.5         | LfG                      | 0.07983                           |
| 12  | 700             | 1.5         | LfG                      | 0.05856                           |

<sup>a</sup> X3 refers to the species of graphite, which is regarded as a discrete variable during experimental design and data fitting. SfG, LfG and MG refers to the small-flaky graphite, large-flaky graphite and microcrystalline graphite respectively.

<sup>b</sup> Y are calculated by the relative intensity of graphite and polyaniline in the XRD pattern of PANI@GE hybrids.

**Table S2.** The kinetic energy of ANI<sup>+</sup> calculated from their average velocity.

| Velocity of ANI <sup>+</sup> (nm·ps <sup>-1</sup> ) | Kinetic energy of ANI <sup>+</sup> (kJ·mmol <sup>-1</sup> ) |
|-----------------------------------------------------|-------------------------------------------------------------|
| 1                                                   | 0.047                                                       |
| 10                                                  | 4.7                                                         |
| 20                                                  | 18.8                                                        |
| 30                                                  | 42.3                                                        |
| 40                                                  | 75.2                                                        |
| 50                                                  | 117.5                                                       |
| 60                                                  | 169.2                                                       |
| 70                                                  | 230.3                                                       |

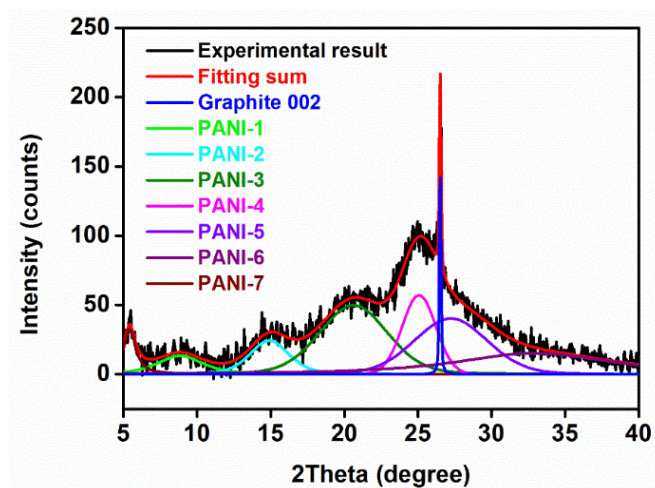

**Figure S1.** Deconvolution of the XRD pattern of PANI@GE hybrids synthesized by *in situ* intercalation polymerization.

**Table S3.** The regression analysis for the *in situ* intercalation polymerization models of the processing factors (X1, X2, X3) and the exfoliation degree of graphene (Y).

| X3 | =SfG                          | =LfG             | =MG              |
|----|-------------------------------|------------------|------------------|
|    | <b>R<sup>2</sup>=0.986933</b> |                  |                  |
| a  |                               | 0.43975737204167 |                  |
| b  |                               | -0.0006746918396 |                  |
| c  |                               | -0.4564358215    |                  |
| d  | -0.0507283199167              | 0.06751952783334 | -0.0167912079167 |
| e  |                               | 0.000004056815   |                  |
| f  | -0.0000227141667              | 0.00002797921083 | -0.0000052650442 |
| g  | 0.0423027525                  | -0.0423027525    | 0                |
| h  |                               | 0.0000006215264  |                  |
| i  |                               | 0.20004190699999 |                  |
| j  |                               | 0                |                  |

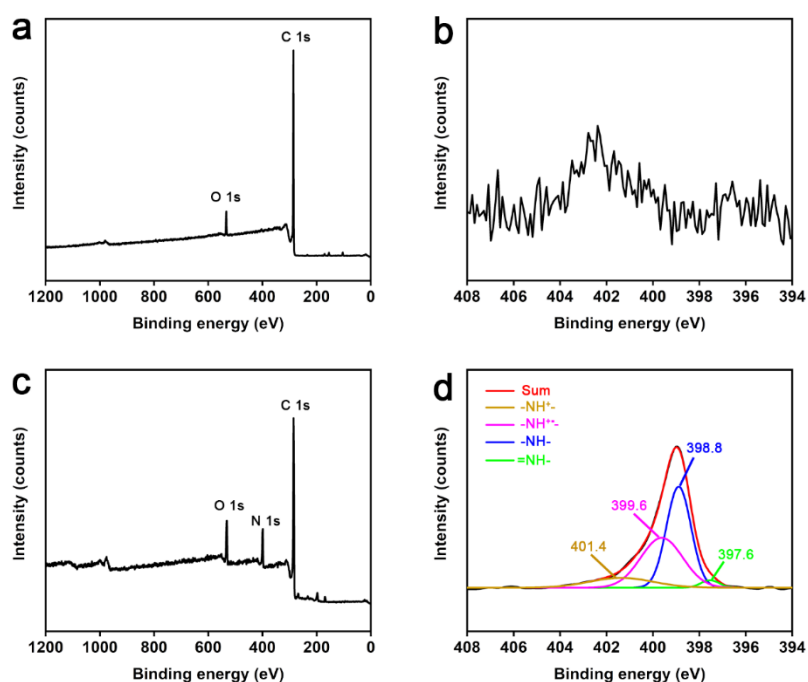

**Figure S2.** XPS spectra of natural graphite and PANI@GE. (a, b) XPS survey and high-resolution N 1s spectra of nature graphite. (c, d) XPS survey and high-resolution N 1s spectra of PANI@GE. The high-resolution spectrum is deconvoluted into 4 peaks.

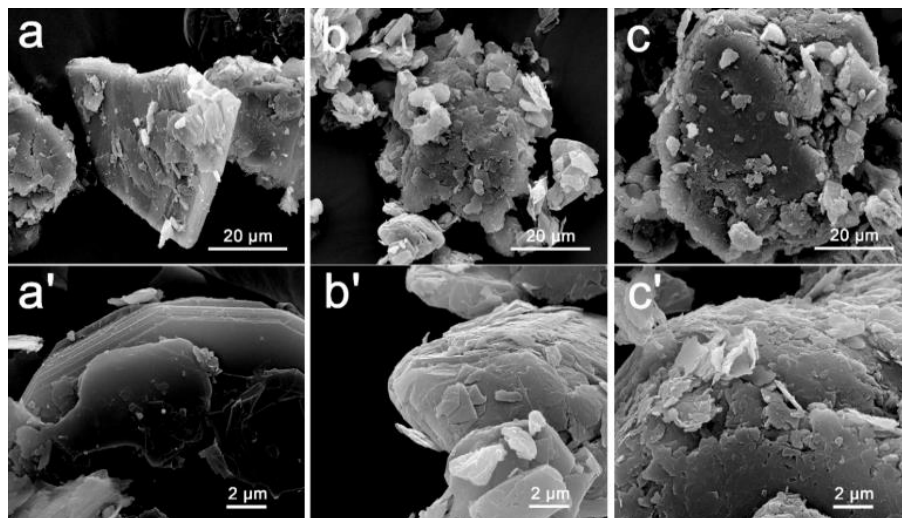

**Figure S3.** SEM images of the natural graphite. (a, a') Large-flaky graphite, (b, b') small-flaky graphite and (c, c') microcrystalline graphite.

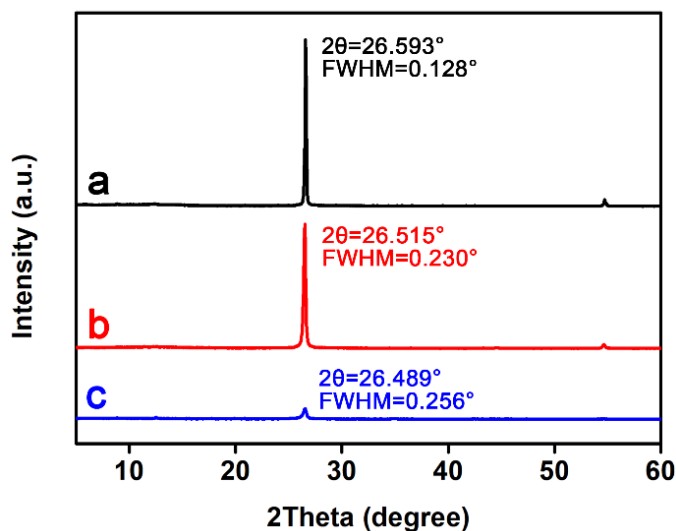

**Figure S4.** XRD patterns of natural graphite. (a) Large-flaky graphite, (b) small-flaky graphite and (c) microcrystalline graphite.

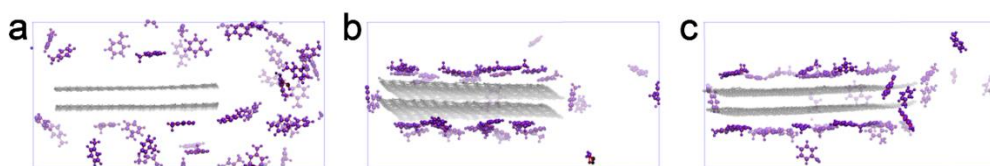

**Figure S5.** Snapshots of few aniline cations achieving the intercalation simulated by molecule dynamic with a simulated time of (a) 0 ns, (b) 5 ns and (c) 10 ns.
